# Supplementary material for: Experimental Study of the Forces and Parameters for the Opening of Incisions Inside Ocular Cavity
Source: Preprints.org preprint supplement (doi:10.20944/preprints202008.0715.v1), 2020-08-31
Supplement: Supplementary file 1 [file supplementary]

## Abstract

The experimental results of forces and efforts derived from the opening of incisions in the orbital cavity in a pig's head are presented in this article. The different areas of the incision openings are related to the needs at the incision procedure for a dacryocystorhinostomy. In terms of experimental procedure, an origin and a plane are defined to allow the location of the opening of the incision. The incisions are retracted along an axis of said origin. This procedure has been based on the mathematical model developed for this work, which consists of a procedure for determining the behavior of an incision when a force is applied to retract the skin. The experimental data obtained, suggests the existence of an almost linear relationship between the increment of resistance in relation to the time obtained for each opening, some of which is deemed to be consistent with the behavior of an elastic material.

**Keywords:** Incisions opening, Forces, parameters, ocular cavity

**Figure 1.** Methodology defined to design an RRS.

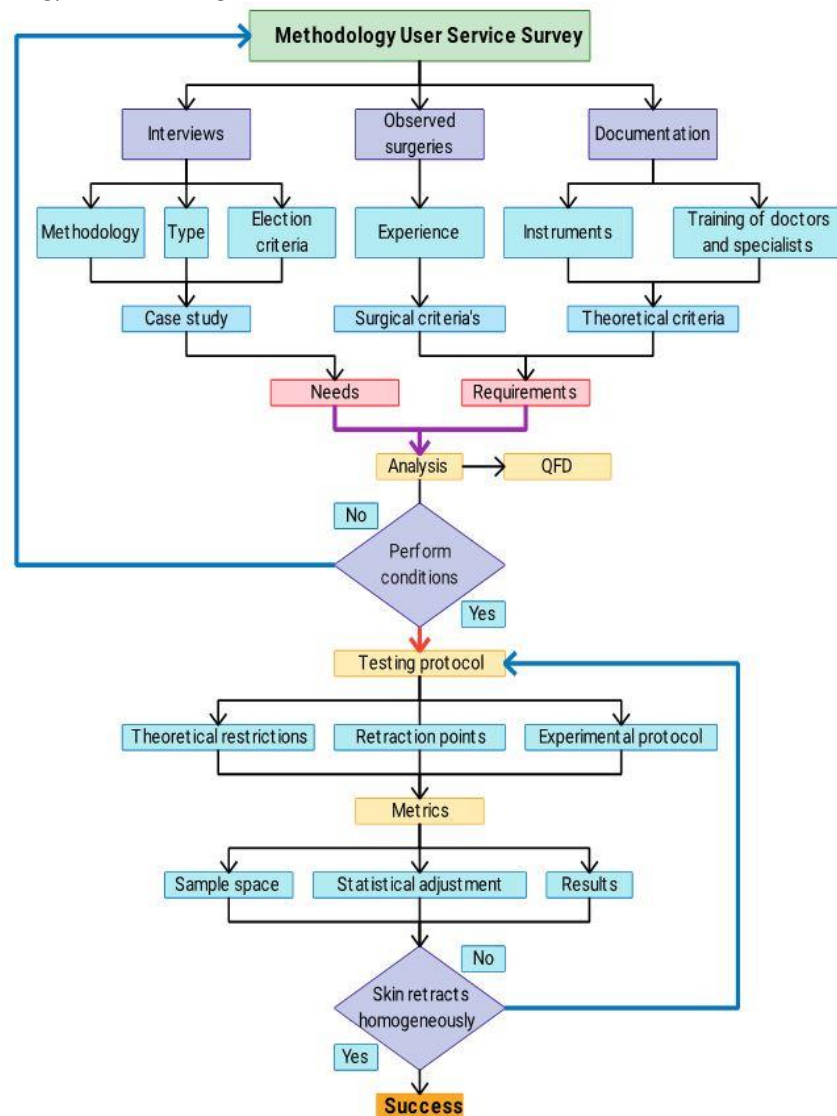

**Figure 1**

**Figure 2.** Given the user necessities the parameters founded on the surgeries observed and the documentation stages, it was possible to realize the following House of Quality

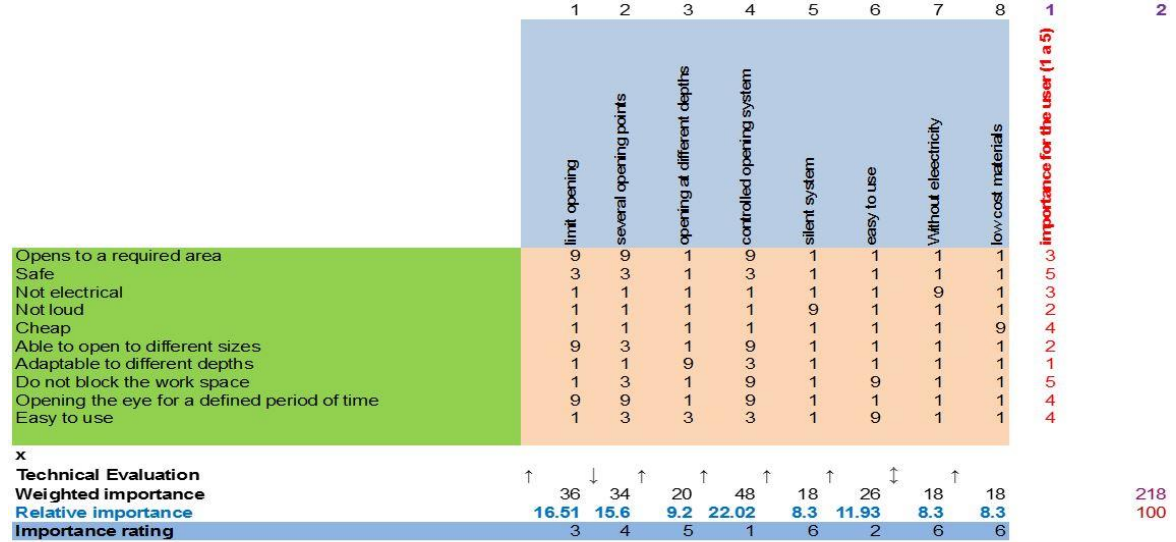

1. Must have an opening system controlled by the specialist and limited by the pressure supported.
2. Must works with a system easy to handle by the specialist
3. Must limit the opening considering the pressure.
4. Must establish opening points considering the required work space and the user safety
5. Must consider different opening depths appropriate to the needs of the specialist
6. Must be a silent operating system
7. Must work without electricity
8. Must be built with low cost materials and systems

**Figure 2**

**Figure 3.** Outline of the theoretical restrictions.

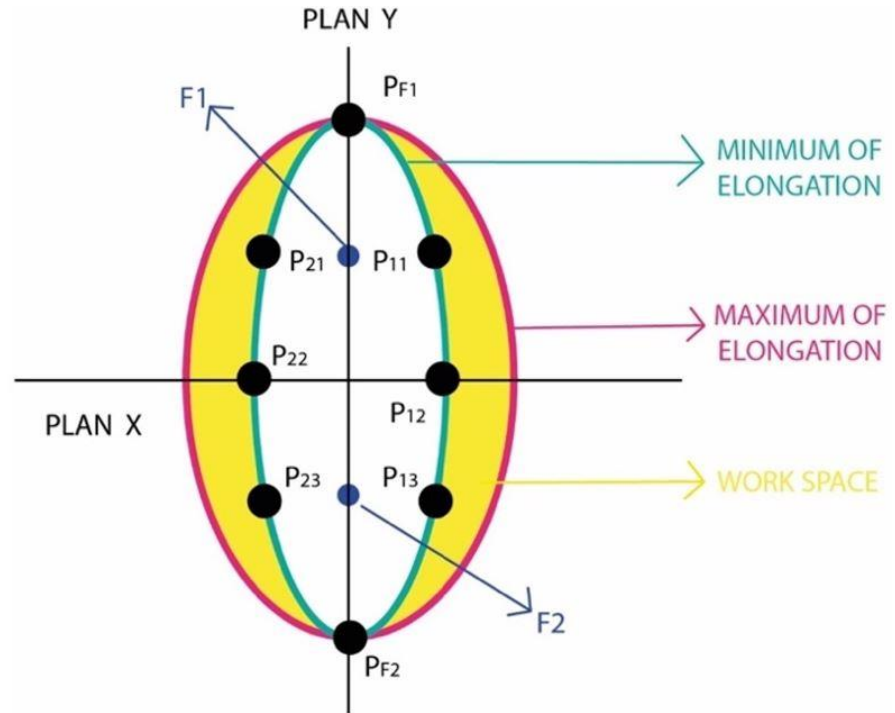

**Figure 3**

**Figure 4.** Outline of the theoretical restrictions.

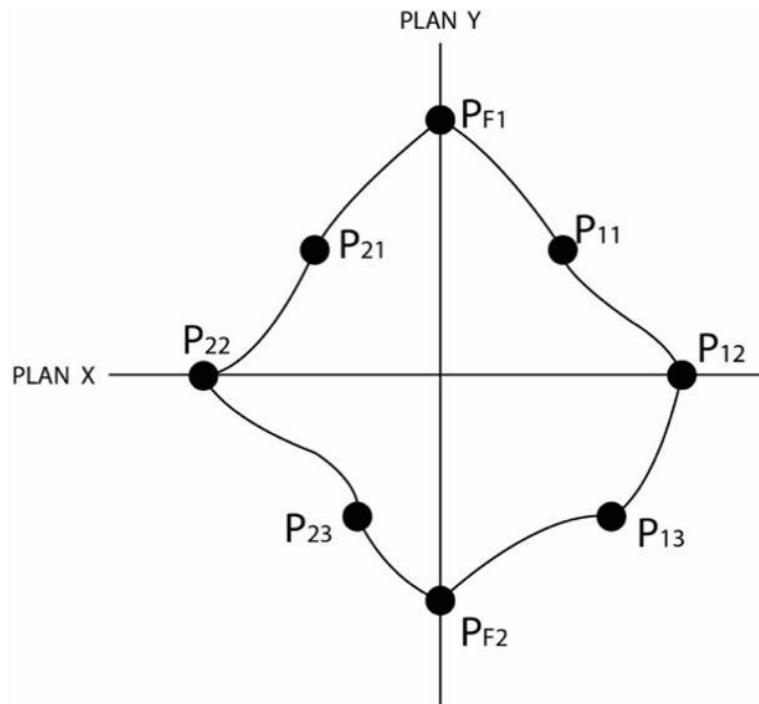

**Figure 4**

**Figure 5.** Experimental protocol.

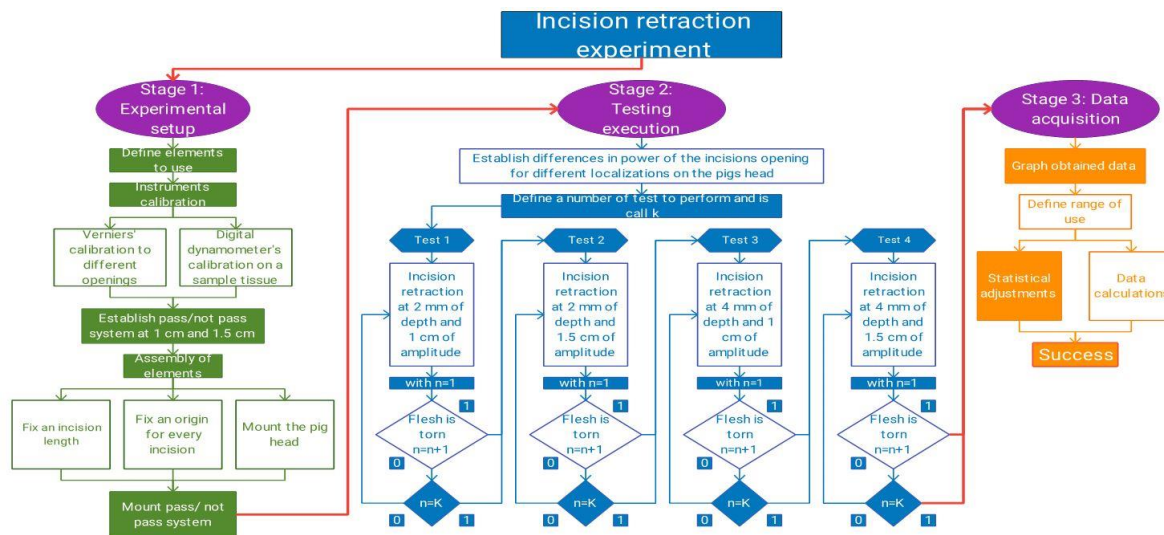

**Figure 5**

**Figure 6.** Forces measured during the entire process of opening the incision.

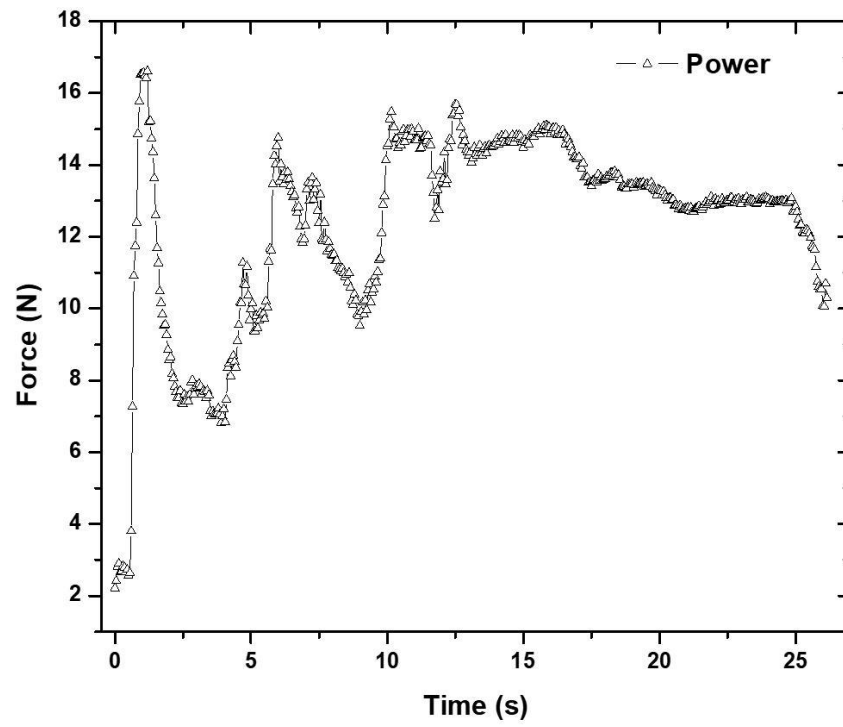

**Figure 6**

**Figure 7.** Lorentz adjustment for the experimental test.

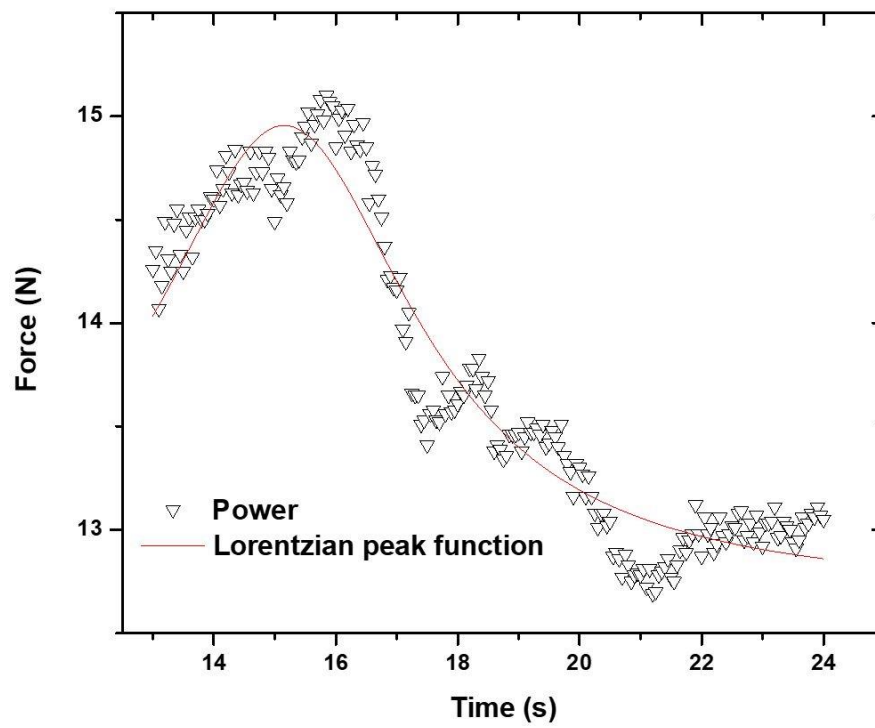

**Figure 7**

**Figure 8.** Lorentz adjustment for the experimental test.

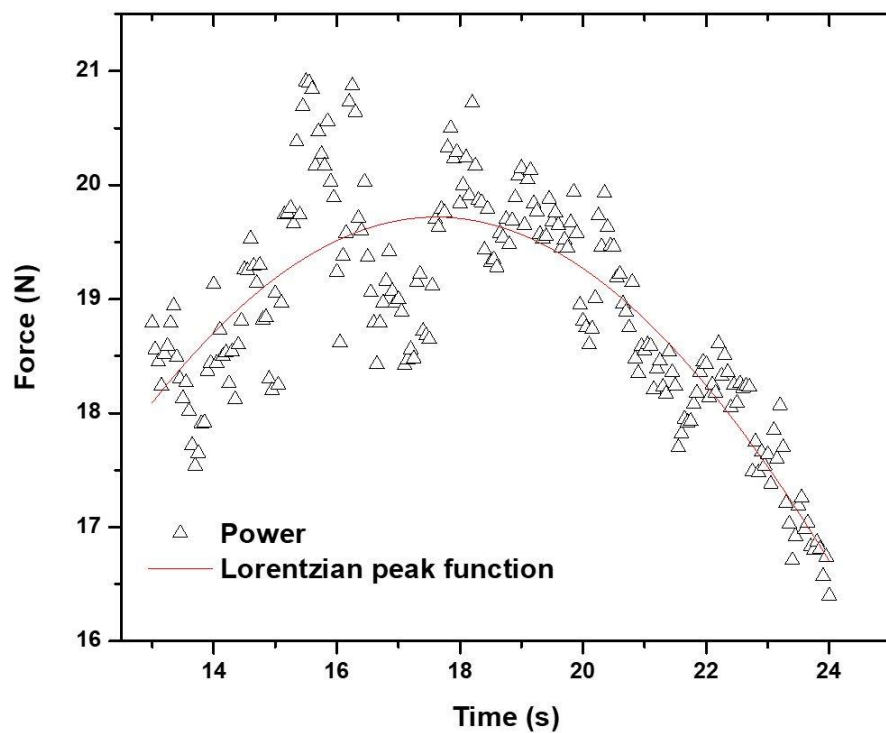

**Figure 8**

**Figure 9.** Lorentz adjustment for the experimental test.

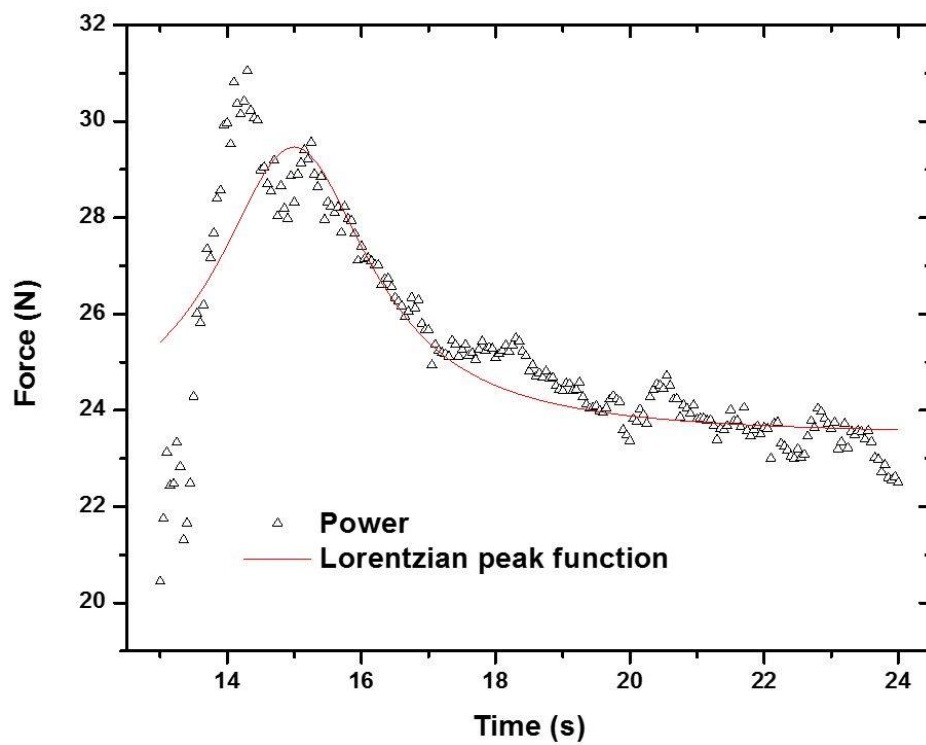

**Figure 9**

**Figure 10.** Lorentz adjustment for the experimental test for the average of all the forces.

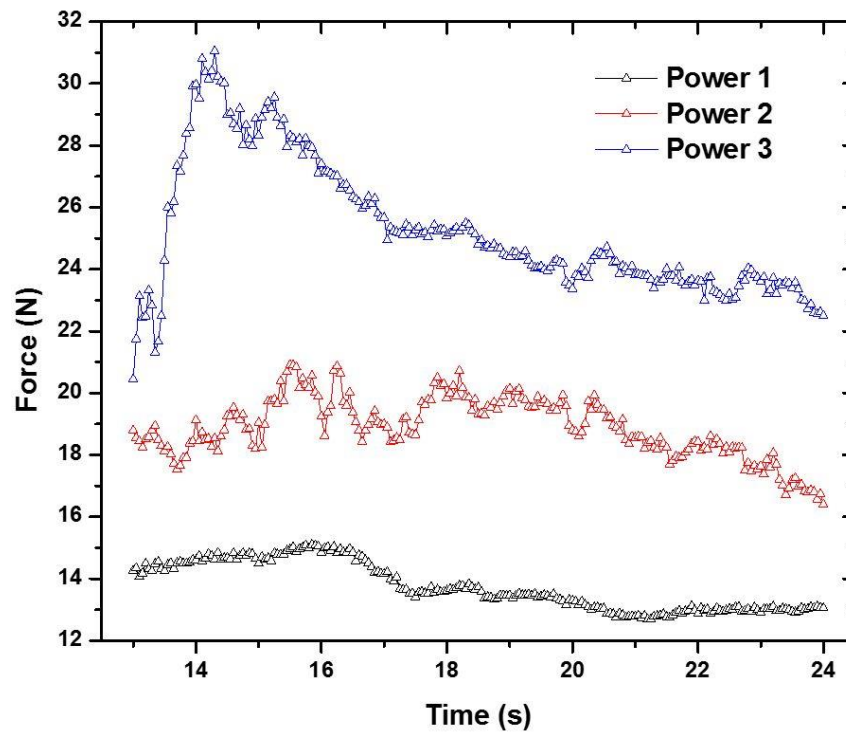

**Figure 10**

**Figure 11.** Graph of media behavior for the three powers measured.

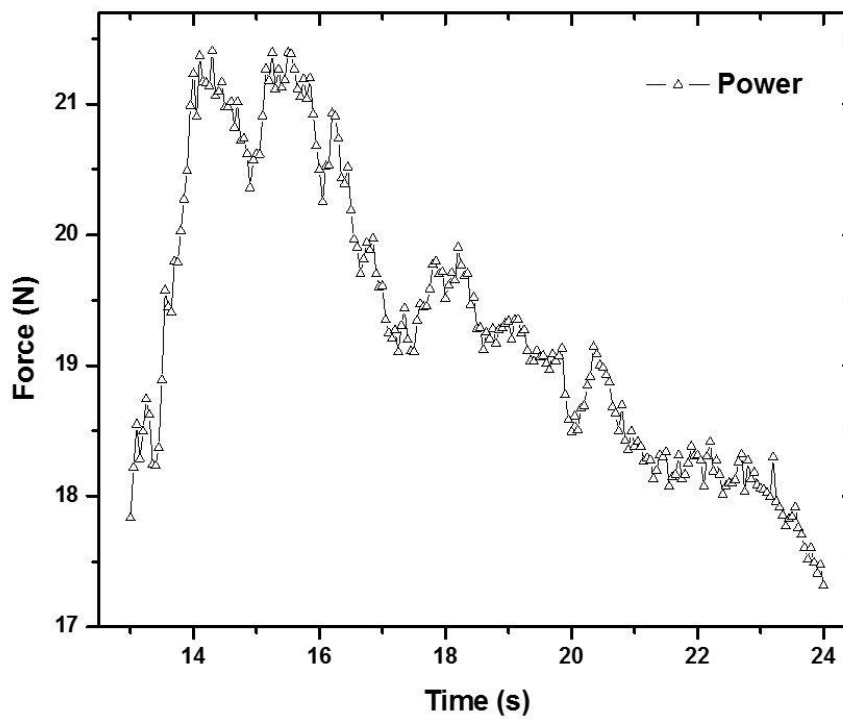

**Figure 11**
